# Supplementary material
Source: PubMed Central journal article supplement (PMC6684052)
Supplement: ahdb-12-188-s2.pdf [file ahdb-12-188-s2.pdf]

## Supplemental Appendix I

### Charlson Comorbidity Index: *ICD-9* Update and *ICD-10* Translation

William P. Glasheen, PhD; Tristan Cordier, MPH; Rajiv Gumpina, MS; Gil Haugh, MS; Jared Davis, MD, MBA; Andrew Renda, MD, MPH

This Appendix has not been edited and is provided as supplemental materials for this article, which was published in *American Health & Drug Benefits* in June/July 2019.

**Table SI-1. CCI Scoring System**

NOTE: The scoring system depicted in this table was used to compute the CCI scores used in the admissions and mortality models (see Methods and Results section in manuscript). It is a modification of the system designed by Quan et al.

| Condition Number | Condition Description                  | Points |
|------------------|----------------------------------------|--------|
| 1                | Myocardial infarction                  | 1      |
| 2                | Congestive heart failure               | 1      |
| 3                | Peripheral vascular disease            | 1      |
| 4                | Cerebrovascular disease                | 1      |
| 5                | Dementia                               | 1      |
| 6                | Chronic pulmonary disease              | 1      |
| 7                | Rheumatic disease                      | 1      |
| 8                | Peptic ulcer disease                   | 1      |
| 9                | Liver disease, mild                    | 1      |
| 10               | Diabetes without chronic complications | 1      |
| 11               | Renal disease, mild to moderate*       | 1      |
| 12               | Diabetes with chronic complications    | 2      |
| 13               | Hemiplegia or paraplegia               | 2      |
| 14               | Any malignancy                         | 2      |
| 15               | Liver disease, moderate to severe      | 3      |
| 16               | Renal disease, severe*                 | 3      |
| 17               | HIV infection, no AIDS                 | 3      |
| 18               | Metastatic solid tumor                 | 6      |
| 19               | AIDS                                   | 6      |

AIDS, acquired immune deficiency syndrome; HIV, human immunodeficiency virus

\* Although liver disease in the instrument proposed here was categorized as mild and moderate-severe, renal disease has been categorized as mild-moderate and severe to reflect the dramatic increase in risk when a patient transitions to stage 5 kidney disease.

**Table SI-2. Hierarchy Categories**

Within each hierarchy category, the milder condition should not contribute to the CCI score if the more severe condition applies even though codes for both may appear for an individual patient in a claims dataset.

| Category | Hierarchy Rule                                                                           |
|----------|------------------------------------------------------------------------------------------|
| 1        | Hemiplegia/paraplegia (Condition 13) trumps cerebrovascular disease (Condition 4)        |
| 2        | Liver disease, moderate-severe (Condition 5) trumps liver disease, mild (Condition 9)    |
| 3        | Diabetes with complications (Condition 12) trumps Diabetes, uncomplicated (Condition 10) |
| 4        | Renal disease, severe (Condition 16) trumps Renal disease, mild-moderate (Condition 11)  |
| 5        | Metastatic solid tumor (Condition 18) trumps malignancy (Condition 14)                   |
| 6        | AIDS (Condition 19) trumps HIV (Condition 14)                                            |

AIDS, acquired immune deficiency syndrome; HIV, human immunodeficiency virus

**Tables SI-3a Through SII-3s**

The following tables correspond to the 19 conditions of Table SII-1.

*Table SI-3a. Deyo and CDMF CCI Coding Schemes: Myocardial Infarction*

| Score | ICD-9 Diagnosis Code<br>(Deyo et al., 1992)                                | ICD-9 Diagnosis Code<br>(CDMF CCI)                                         | ICD-10 Diagnosis Code<br>(CDMF CCI)                                                                  |
|-------|----------------------------------------------------------------------------|----------------------------------------------------------------------------|------------------------------------------------------------------------------------------------------|
| 1     | 410.x Acute Myocardial<br>Infarction<br>412.x Old Myocardial<br>Infarction | 410.x Acute Myocardial<br>Infarction<br>412.x Old Myocardial<br>Infarction | I21.x STEMI and NSTEMI<br>I22.x Subsequent STEMI and<br>NSTEMI<br>I25.2 Old Myocardial<br>Infarction |

Table SI-3b. Deyo and CDMF CCI Coding Schemes: Congestive Heart Failure

| Score | ICD-9 Diagnosis Code<br>(Deyo et al., 1992) | ICD-9 Diagnosis Code<br>(CDMF CCI)                                                                                                                                                                                                                                                                                                                                                                                                                                                                                                                                                                                                                                                                                                                                                                                                                                                                                                                                                                                                        | ICD-10 Diagnosis Code<br>(CDMF CCI)                                                                                                                                                                                                                                                                                                                                                                                                                                                                                                                                                                                                                                                                                                                      |
|-------|---------------------------------------------|-------------------------------------------------------------------------------------------------------------------------------------------------------------------------------------------------------------------------------------------------------------------------------------------------------------------------------------------------------------------------------------------------------------------------------------------------------------------------------------------------------------------------------------------------------------------------------------------------------------------------------------------------------------------------------------------------------------------------------------------------------------------------------------------------------------------------------------------------------------------------------------------------------------------------------------------------------------------------------------------------------------------------------------------|----------------------------------------------------------------------------------------------------------------------------------------------------------------------------------------------------------------------------------------------------------------------------------------------------------------------------------------------------------------------------------------------------------------------------------------------------------------------------------------------------------------------------------------------------------------------------------------------------------------------------------------------------------------------------------------------------------------------------------------------------------|
| 1     | 428.x Heart Failure                         | 398.91 Rheumatic heart failure (congestive)<br>402.01 Malignant hypertensive heart disease with heart failure<br>402.11 Benign hypertensive heart disease with heart failure<br>402.91 Unspecified hypertensive disease with heart failure<br>404.01 Hypertensive heart and chronic kidney disease, malignant, with heart failure and with chronic kidney disease stage I through stage IV, or unspecified<br>404.03 Hypertensive heart and chronic kidney disease, malignant, with heart failure and with chronic kidney disease stage V or end stage renal disease<br>404.11 Hypertensive heart and chronic kidney disease, benign, with heart failure and with chronic kidney disease stage I through stage IV, or unspecified<br>404.13 Hypertensive heart and chronic kidney disease, benign, with heart failure and chronic kidney disease stage V or end stage renal disease<br>404.91 Hypertensive heart and chronic kidney disease, unspecified, with heart failure and with chronic kidney disease stage I through stage IV, or | I11.0 Hypertensive heart disease with heart failure<br>I13.0 Hypertensive heart and chronic kidney disease with heart failure and stage 1 through stage 4 chronic kidney disease, or unspecified chronic kidney disease<br>I13.2 Hypertensive heart and chronic kidney disease with heart failure and with stage 5 chronic kidney disease, or end stage renal disease<br>I25.5 Ischemic cardiomyopathy<br>I42.0 Cardiomyopathy<br>I42.5 Other restrictive cardiomyopathy<br>I42.6 Alcoholic cardiomyopathy<br>I42.7 Cardiomyopathy due to drug and external agent<br>I42.8 Other cardiomyopathies<br>I42.9 Cardiomyopathy, unspecified<br>I43.x Cardiomyopathy in diseases classified elsewhere<br>I50.x Heart failure<br>P29.0 Neonatal cardiac failure |

| Score | ICD-9 Diagnosis Code<br>(Deyo et al., 1992) | ICD-9 Diagnosis Code<br>(CDMF CCI)                                                                                                                                                                                                                                                                                                                                                                                                                                                                                                       | ICD-10 Diagnosis Code<br>(CDMF CCI) |
|-------|---------------------------------------------|------------------------------------------------------------------------------------------------------------------------------------------------------------------------------------------------------------------------------------------------------------------------------------------------------------------------------------------------------------------------------------------------------------------------------------------------------------------------------------------------------------------------------------------|-------------------------------------|
|       |                                             | unspecified<br>404.93 Hypertensive heart<br>and chronic kidney<br>disease, unspecified,<br>with heart failure and<br>chronic kidney disease<br>stage V or end stage<br>renal disease<br>425.4 Other primary<br>cardiomyopathies<br>425.5 Alcoholic<br>cardiomyopathy<br>425.6 Cardiomyopathy in<br>Chagas disease<br>425.7 Nutritional and<br>metabolic<br>cardiomyopathy<br>425.8 Cardiomyopathy in<br>other disease<br>classified elsewhere<br>425.9 Secondary<br>cardiomyopathy,<br>unspecified<br>428.x unspecified<br>Heart failure |                                     |

Table SI-3c. Deyo and CDMF CCI Coding Schemes: Peripheral Vascular Disease

| Score | ICD-9 Diagnosis Code<br>(Deyo et al., 1992) | ICD-9 Diagnosis Code<br>(CDMF CCI)                                                              | ICD-10 Diagnosis Code<br>(CDMF CCI)                   |
|-------|---------------------------------------------|-------------------------------------------------------------------------------------------------|-------------------------------------------------------|
| 1     | 443.9                                       | Peripheral vascular disease, unspecified                                                        | 093.0 Aneurysm of aorta, specified as syphilitic      |
|       | 444.x                                       | Arterial embolism and thrombosis                                                                | 437.3 Cerebral aneurysm, non-ruptured                 |
|       | 785.4                                       | Gangrene                                                                                        | 440.x Atherosclerosis                                 |
|       | V43.4*                                      | Presence of other vascular implants and grafts                                                  | 441.x Aortic aneurysm and dissection                  |
|       | Proc                                        | Resection of vessel with replacement, lower limb arteries                                       | 443.1 Thromboangiitis obliterans [Buerger's disease]  |
|       | 38.48                                       |                                                                                                 | 443.2x Other arterial dissection                      |
|       |                                             |                                                                                                 | 443.8x Other specified peripheral vascular diseases   |
|       |                                             |                                                                                                 | 443.9 Peripheral vascular disease, unspecified        |
|       |                                             |                                                                                                 | 447.1 Stricture of artery                             |
|       |                                             |                                                                                                 | 557.1 Chronic vascular insufficiency of intestine     |
|       |                                             |                                                                                                 | 557.9 Unspecified vascular insufficiency of intestine |
|       |                                             |                                                                                                 | V43.4* Blood vessels replaced by other means          |
|       |                                             |                                                                                                 | I70.x Atherosclerosis                                 |
|       |                                             |                                                                                                 | I71.x Aortic aneurysm and dissection                  |
|       |                                             |                                                                                                 | I73.1 Thromboangiitis obliterans [Buerger's disease]  |
|       |                                             |                                                                                                 | I73.8 Other specified peripheral vascular diseases    |
|       |                                             |                                                                                                 | I73.9 Peripheral vascular disease, unspecified        |
|       |                                             | I77.1 Stricture of artery                                                                       |                                                       |
|       |                                             | I79.0 Aneurysm of aorta in diseases classified elsewhere                                        |                                                       |
|       |                                             | I79.1 Aortitis in diseases classified elsewhere                                                 |                                                       |
|       |                                             | I79.8 Other disorders of arteries, arterioles, and capillaries in diseases classified elsewhere |                                                       |
|       |                                             | K55.1 Chronic vascular disorders of intestine                                                   |                                                       |
|       |                                             | K55.8 Other vascular disorders of intestine                                                     |                                                       |
|       |                                             | K55.9 Vascular disorder of intestine, unspecified                                               |                                                       |
|       |                                             | Z95.8 Presence of other cardiac and vascular implants and grafts                                |                                                       |
|       |                                             | Z95.9 Presence of cardiac and vascular implant and graft, unspecified                           |                                                       |

Table SI-3d. Deyo and CDMF CCI Coding Schemes: Cerebrovascular Disease

| Score | ICD-9 Diagnosis Code<br>(Deyo et al., 1992)           | ICD-9 Diagnosis Code<br>(CDMF CCI)                                                         | ICD-10 Diagnosis Code<br>(CDMF CCI)                               |
|-------|-------------------------------------------------------|--------------------------------------------------------------------------------------------|-------------------------------------------------------------------|
| 1     | 430.x Subarachnoid hemorrhage                         | 362.34 Transient retinal arterial occlusion                                                | G45.x Transient cerebral ischemic attacks and related syndromes   |
|       | 431.x Intracerebral hemorrhage                        | 430.x Subarachnoid hemorrhage                                                              | G46.x Vascular syndromes of brain in cerebrovascular diseases     |
|       | 432.x Other and unspecified intracranial hemorrhage   | 431.x Intracerebral hemorrhage                                                             | H34.0x Transient retinal artery occlusion                         |
|       | 433.x Occlusion and stenosis of precerebral arteries  | 432.x Other and unspecified intracranial hemorrhage                                        | H34.1x Central retinal artery occlusion                           |
|       | 434.x Occlusion of cerebral arteries                  | 433.x Occlusion and stenosis of precerebral arteries                                       | H34.2x Other retinal artery occlusions                            |
|       | 435.x Transient cerebral ischemia                     | 434.x Occlusion of cerebral arteries                                                       | I60.x Non-traumatic subarachnoid hemorrhage                       |
|       | 436.x Acute, but ill-defined, cerebrovascular disease | 435.x Transient cerebral ischemia                                                          | I61.x Non-traumatic intracerebral hemorrhage                      |
|       | 437.x Other and ill-defined cerebrovascular disease   | 436.x Acute, but ill-defined, cerebrovascular disease                                      | I62.x Other and unspecified non-traumatic intracranial hemorrhage |
|       | 438.x Late effects of cerebrovascular disease         | 437.x Other and ill-defined cerebrovascular disease                                        | I63.x Cerebral infarction                                         |
|       |                                                       | 438.x Late effects of cerebrovascular disease                                              | I64.x Stroke, not specified as hemorrhage or infarction           |
|       |                                                       | I65.x Occlusion and stenosis of precerebral arteries, not resulting in cerebral infarction |                                                                   |
|       |                                                       | I66.x Occlusion and stenosis of cerebral arteries, not resulting in cerebral infarction    |                                                                   |
|       |                                                       | I67.x Other cerebrovascular diseases                                                       |                                                                   |
|       |                                                       | I68.x Cerebrovascular disorders in diseases classified elsewhere                           |                                                                   |

Table SI-3e. Deyo and CDMF CCI Coding Schemes: Dementia

| Score | ICD-9 Diagnosis Code<br>(Deyo et al., 1992) | ICD-9 Diagnosis Code<br>(CDMF CCI)                                                                                                                                                                                                                                                                                                                                                                                                                                                                                                                                                                                                                            | ICD-10 Diagnosis Code<br>(CDMF CCI)                                                                                                                                                                                                                                                                                                                                                                                                                                                                                                                                                                                                                                                                                                                                                                                                                                                                                                                                            |
|-------|---------------------------------------------|---------------------------------------------------------------------------------------------------------------------------------------------------------------------------------------------------------------------------------------------------------------------------------------------------------------------------------------------------------------------------------------------------------------------------------------------------------------------------------------------------------------------------------------------------------------------------------------------------------------------------------------------------------------|--------------------------------------------------------------------------------------------------------------------------------------------------------------------------------------------------------------------------------------------------------------------------------------------------------------------------------------------------------------------------------------------------------------------------------------------------------------------------------------------------------------------------------------------------------------------------------------------------------------------------------------------------------------------------------------------------------------------------------------------------------------------------------------------------------------------------------------------------------------------------------------------------------------------------------------------------------------------------------|
| 1     | 290.x Dementias                             | 290.0 Senile dementia, uncomplicated<br>290.1x Presenile dementia<br>290.2x Senile dementia with delusional or depressive features<br>290.3 Senile dementia with delirium<br>290.4x Vascular dementia<br>294.0 Amnestic disorder in conditions classified elsewhere<br>294.1x Dementia in conditions classified elsewhere<br>294.2x Dementia, unspecified<br>294.8 Other persistent mental disorders due to conditions classified elsewhere<br>331.0 Alzheimer's disease<br>331.1x Frontotemporal dementia<br>331.2 Senile degeneration of brain<br>331.7 Cerebral degeneration in diseases classified elsewhere<br>797 Senility without mention of psychosis | F01.x Vascular dementia<br>F02.x Dementia in other diseases classified elsewhere<br>F03.x Unspecified dementia<br>F04 Amnestic disorder due to known physiological condition<br>F05 Delirium due to known physiological condition<br>F06.1 Catatonic disorder due to known physiological condition<br>F06.8 Other specified mental disorders due to known physiological condition<br>G13.2 Systemic atrophy primarily affecting the central nervous system in myxedema<br>G13.8 Systemic atrophy primarily affecting central nervous system in other diseases classified elsewhere<br>G30.x Alzheimer's disease<br>G31.0x Frontotemporal dementia<br>G31.1 Senile degeneration of brain, not elsewhere classified<br>G31.2 Degeneration of nervous system due to alcohol<br>G91.4 Hydrocephalus in diseases classified elsewhere<br>G94 Other disorders of brain in diseases classified elsewhere<br>R41.81 Age-related cognitive decline<br>R54 Age-related physical debility |

Table SI-3f. Deyo and CDMF CCI Coding Schemes: Chronic Pulmonary Disease

| Score | ICD-9 Diagnosis Code<br>(Deyo et al., 1992)                | ICD-9 Diagnosis Code<br>(CDMF CCI)                                  | ICD-10 Diagnosis Code<br>(CDMF CCI)                                            |
|-------|------------------------------------------------------------|---------------------------------------------------------------------|--------------------------------------------------------------------------------|
| 1     | 490.x Bronchitis, not specified as acute or chronic        | 490.x Bronchitis, not specified as acute or chronic                 | J40.x Bronchitis, not specified as acute or chronic                            |
|       | 491.x Chronic bronchitis                                   | 491.x Chronic bronchitis                                            | J41.x Simple and mucopurulent chronic bronchitis                               |
|       | 492.x Emphysema                                            | 492.x Emphysema                                                     | J42.x Unspecified chronic bronchitis                                           |
|       | 493.x Asthma                                               | 493.x Asthma                                                        | J43.x Emphysema                                                                |
|       | 494.x Bronchiectasis                                       | 494.x Bronchiectasis                                                | J44.x Other chronic obstructive pulmonary disease                              |
|       | 495.x Extrinsic allergic alveolitis                        | 495.x Extrinsic allergic alveolitis                                 | J45.x Asthma                                                                   |
|       | 496.x Chronic airway obstruction, not elsewhere classified | 496.x Chronic airway obstruction, not elsewhere classified          | J46.x Status asthmaticus                                                       |
|       | 500.x Coal workers' pneumoconiosis                         | 500.x Coal workers' pneumoconiosis                                  | J47.x Bronchiectasis                                                           |
|       | 501.x Asbestosis                                           | 501.x Asbestosis                                                    | J60.x Coal worker's pneumoconiosis                                             |
|       | 502.x Pneumoconiosis due to other silica or silicates      | 502.x Pneumoconiosis due to other silica or silicates               | J61.x Pneumoconiosis due to asbestos and other mineral fibers                  |
|       | 503.x Pneumoconiosis due to other inorganic dust           | 503.x Pneumoconiosis due to other inorganic dust                    | J62.x Pneumoconiosis due to dust containing silica                             |
|       | 504.x Pneumonopathy due to inhalation of other dust        | 504.x Pneumonopathy due to inhalation of other dust                 | J63.x Pneumoconiosis due to other inorganic dusts                              |
|       | 505.x Pneumoconiosis, unspecified                          | 505.x Pneumoconiosis, unspecified                                   | J64.x Unspecified pneumoconiosis                                               |
|       |                                                            | 506.4 Chronic respiratory conditions due to fumes and vapors        | J65.x Pneumoconiosis associated with tuberculosis                              |
|       |                                                            | 508.1 Chronic and other pulmonary manifestations due to radiation   | J66.x Airway disease due to specific organic dust                              |
|       |                                                            | 508.8 Respiratory conditions due to other specified external agents | J67.x Hypersensitivity pneumonitis due to organic dust                         |
|       |                                                            |                                                                     | J68.4 Chronic respiratory conditions due to chemicals, gases, fumes and vapors |
|       |                                                            | J70.1 Chronic and other pulmonary manifestations due to radiation   |                                                                                |
|       |                                                            | J70.3 Chronic drug-induced interstitial lung disorders              |                                                                                |

Table SI-3g. Deyo and CDMF CCI Coding Schemes: Rheumatic Disease

| Score | ICD-9 Diagnosis Code<br>(Deyo et al., 1992)                            | ICD-9 Diagnosis Code<br>(CDMF CCI)                                     | ICD-10 Diagnosis Code<br>(CDMF CCI)                    |
|-------|------------------------------------------------------------------------|------------------------------------------------------------------------|--------------------------------------------------------|
| 1     | 710.0 Systemic lupus erythematosus                                     | 446.5 Polyarteritis nodosa and allied conditions                       | M05.x Rheumatoid arthritis with rheumatoid factor      |
|       | 710.1 Systemic sclerosis                                               | 710.0 Systemic lupus erythematosus                                     | M06.x Other rheumatoid arthritis                       |
|       | 710.4 Polymyositis                                                     | 710.1 Systemic sclerosis                                               | M31.5 Giant cell arteritis with polymyalgia rheumatica |
|       | 714.0 Rheumatoid arthritis and other inflammatory polyarthropathies    | 710.2 Sicca syndrome                                                   | M32.x Systemic lupus erythematosus (SLE)               |
|       | 714.1 Rheumatoid arthritis                                             | 710.3 Dermatomyositis                                                  | M33.x Dermatopolymyositis                              |
|       | 714.2 Other rheumatoid arthritis with visceral or systemic involvement | 710.4 Polymyositis                                                     | M34.x Systemic sclerosis [scleroderma]                 |
|       | 714.81 Rheumatoid lung                                                 | 714.0 Rheumatoid arthritis                                             | M35.1 Other overlap syndromes                          |
|       | 725.x Polymyalgia rheumatica                                           | 714.1 Felty's syndrome                                                 | M35.3 Polymyalgia rheumatica                           |
|       |                                                                        | 714.2 Other rheumatoid arthritis with visceral or systemic involvement | M36.0 Dermato(poly)myositis in neoplastic disease      |
|       |                                                                        | 714.8x Other specified inflammatory polyarthropathies                  |                                                        |
|       |                                                                        | 725.x Polymyalgia rheumatica                                           |                                                        |

Table SI-3h. CCI Coding Scheme: Peptic Ulcer Disease

| Score | ICD-9 Diagnosis Code<br>(Deyo et al., 1992) | ICD-9 Diagnosis Code<br>(CDMF CCI)  | ICD-10 Diagnosis Code<br>(CDMF CCI)  |
|-------|---------------------------------------------|-------------------------------------|--------------------------------------|
| 1     | 531.x Gastric ulcer                         | 531.x Gastric ulcer                 | K25.x Gastric ulcer                  |
|       | 532.x Duodenal ulcer                        | 532.x Duodenal ulcer                | K26.x Duodenal ulcer                 |
|       | 533.x Peptic ulcer site unspecified         | 533.x Peptic ulcer site unspecified | K27.x Peptic ulcer, site unspecified |
|       | 534.x Gastrojejunal ulcer                   | 534.x Gastrojejunal ulcer           | K28.x Gastrojejunal ulcer            |

Table SI-3i. Deyo and CDMF CCI Coding Schemes: Mild Liver Disease

| Score | ICD-9 Diagnosis Code<br>(Deyo et al., 1992) | ICD-9 Diagnosis Code<br>(CDMF CCI)                             | ICD-10 Diagnosis Code<br>(CDMF CCI)                                                                 |
|-------|---------------------------------------------|----------------------------------------------------------------|-----------------------------------------------------------------------------------------------------|
| 1     | 571.2                                       | Alcoholic cirrhosis of liver                                   | 070.22 Chronic viral hepatitis B with hepatic coma without hepatitis delta                          |
|       | 571.4                                       | Chronic hepatitis                                              | 070.23 Chronic viral hepatitis B with hepatic coma with hepatitis delta                             |
|       | 571.5                                       | Cirrhosis of liver without mention of alcohol                  | 070.32 Chronic viral hepatitis B without mention of hepatic coma without mention of hepatitis delta |
|       | 571.6                                       | Biliary cirrhosis                                              | 070.33 Chronic viral hepatitis B without mention of hepatic coma with hepatitis delta               |
|       |                                             |                                                                | 070.44 Chronic hepatitis C with hepatic coma                                                        |
|       |                                             |                                                                | 070.54 Chronic hepatitis C without mention of hepatic coma                                          |
|       |                                             |                                                                | 070.6 Unspecified viral hepatitis with hepatic coma                                                 |
|       |                                             |                                                                | 070.9 Unspecified viral hepatitis without mention of hepatic coma                                   |
|       |                                             |                                                                | 570.x Acute and subacute necrosis of liver                                                          |
|       |                                             |                                                                | 571.x Chronic liver disease and cirrhosis                                                           |
|       |                                             |                                                                | 573.3 Hepatitis, unspecified                                                                        |
|       |                                             |                                                                | 573.4 Hepatic infarction                                                                            |
|       |                                             |                                                                | 573.8 Other specified disorders of liver                                                            |
|       |                                             |                                                                | 573.9 Unspecified disorder of liver                                                                 |
|       |                                             |                                                                | V42.7* Liver replaced by transplant                                                                 |
|       |                                             |                                                                | B18.x Chronic viral hepatitis                                                                       |
|       |                                             |                                                                | K70.0 Alcoholic fatty liver                                                                         |
|       |                                             | K70.1 Alcoholic hepatitis                                      |                                                                                                     |
|       |                                             | K70.2 Alcoholic fibrosis and sclerosis of liver                |                                                                                                     |
|       |                                             | K70.3 Alcoholic cirrhosis of liver                             |                                                                                                     |
|       |                                             | K70.9 Alcoholic liver disease, unspecified                     |                                                                                                     |
|       |                                             | K71.3 Toxic liver disease with chronic persistent hepatitis    |                                                                                                     |
|       |                                             | K71.4 Toxic liver disease with chronic lobular hepatitis       |                                                                                                     |
|       |                                             | K71.5 Toxic liver disease with chronic active hepatitis        |                                                                                                     |
|       |                                             | K71.7 Toxic liver disease with fibrosis and cirrhosis of liver |                                                                                                     |
|       |                                             | K73.x Chronic hepatitis, not elsewhere classified              |                                                                                                     |
|       |                                             | K74.x Fibrosis and cirrhosis of liver                          |                                                                                                     |
|       |                                             | K76.0 Fatty (change of) liver, not elsewhere classified        |                                                                                                     |
|       |                                             | K76.2 Central hemorrhagic necrosis of liver                    |                                                                                                     |
|       |                                             | K76.3 Infarction of liver                                      |                                                                                                     |
|       |                                             | K76.4 Peliosis hepatis                                         |                                                                                                     |
|       |                                             | K76.8 Other specified diseases of liver                        |                                                                                                     |
|       |                                             | K76.9 Liver disease, unspecified                               |                                                                                                     |
|       |                                             | Z94.4 Liver transplant status                                  |                                                                                                     |

Table SI-3j. Deyo and CDMF CCI Coding Schemes: Diabetes without chronic complication

| Score | ICD-9 Diagnosis Code<br>(Deyo et al., 1992)                                                                    | ICD-9 Diagnosis Code<br>(CDMF CCI)                                                                          | ICD-10 Diagnosis Code<br>(CDMF CCI)                                                                                                                                                                                                                                                                                                                                                                                                                |
|-------|----------------------------------------------------------------------------------------------------------------|-------------------------------------------------------------------------------------------------------------|----------------------------------------------------------------------------------------------------------------------------------------------------------------------------------------------------------------------------------------------------------------------------------------------------------------------------------------------------------------------------------------------------------------------------------------------------|
| 1     | 250.0x Diabetes mellitus without mention of complication                                                       | 250.8x Diabetes with other specified manifestations                                                         | <u>Main Codes</u><br>E08 Diabetes mellitus due to underlying condition<br>E09 Drug or chemical induced diabetes mellitus<br>E10 Type 1 diabetes mellitus<br>E11 Type 2 diabetes mellitus<br>E13 Other specified diabetes mellitus<br><br><u>Relevant Subcodes</u><br>E**.0x With hyperosmolarity<br>E**.1x With ketoacidosis<br>E**.6x With other specified complications<br>E**.8x With unspecified complications<br>E**.9x Without complications |
|       | 250.1x Diabetes with ketoacidosis                                                                              | 250.9x Diabetes with unspecified complication                                                               |                                                                                                                                                                                                                                                                                                                                                                                                                                                    |
|       | 250.2x Diabetes with hyperosmolarity                                                                           | 249.0x Secondary diabetes mellitus without mention of complication                                          |                                                                                                                                                                                                                                                                                                                                                                                                                                                    |
|       | 250.3x Diabetes with other coma                                                                                | 249.1x Secondary diabetes mellitus with ketoacidosis                                                        |                                                                                                                                                                                                                                                                                                                                                                                                                                                    |
|       | 250.7x Diabetes with peripheral circulatory disorders, type II or unspecified type, not stated as uncontrolled | 249.2x Secondary diabetes mellitus with hyperosmolarity                                                     |                                                                                                                                                                                                                                                                                                                                                                                                                                                    |
|       |                                                                                                                | 249.3x Secondary diabetes mellitus with other coma                                                          |                                                                                                                                                                                                                                                                                                                                                                                                                                                    |
|       |                                                                                                                | 249.9x Secondary diabetes mellitus with unspecified complication, no stated an uncontrolled, or unspecified |                                                                                                                                                                                                                                                                                                                                                                                                                                                    |

Table SI-3k. Deyo and CDMF CCI Coding Schemes: Renal (Mild or Moderate)

| Score | ICD-9 Diagnosis Code<br>(CDMF CCI)                                                                                                                                | ICD-10 Diagnosis Code<br>(CDMF CCI)                                                                                                                              |
|-------|-------------------------------------------------------------------------------------------------------------------------------------------------------------------|------------------------------------------------------------------------------------------------------------------------------------------------------------------|
| 1     | 403.00 Hypertensive chronic kidney disease, malignant, with chronic kidney disease stage I through stage IV, or unspecified                                       | I12.9 Hypertensive chronic kidney disease with stage 1 through stage 4 chronic kidney disease, or unspecified chronic kidney disease                             |
|       | 403.10 Hypertensive chronic kidney disease, benign, with chronic kidney disease stage I through stage IV, or unspecified                                          | I13.0 Hypertensive heart and chronic kidney disease with heart failure and stage 1 through stage 4 chronic kidney disease, or unspecified chronic kidney disease |
|       | 403.90 Hypertensive chronic kidney disease, unspecified, with chronic kidney disease stage I through stage IV, or unspecified                                     | I13.10 Hypertensive heart and CKD without heart failure with stage 1 through stage 4 chronic kidney disease, or unspecified chronic kidney disease               |
|       | 404.00 Hypertensive heart and chronic kidney disease, malignant, without heart failure and with chronic kidney disease stage I through stage IV, or unspecified   | N03.x Chronic nephritic syndrome                                                                                                                                 |
|       | 404.01 Hypertensive heart and chronic kidney disease, malignant, with heart failure and with chronic kidney disease stage I through stage IV, or unspecified      | N05.x Unspecified nephritic syndrome                                                                                                                             |
|       | 404.10 Hypertensive heart and chronic kidney disease, benign, without heart failure and with chronic kidney disease stage I through stage IV, or unspecified      | N18.1 Chronic kidney disease, Stage 1                                                                                                                            |
|       | 404.11 Hypertensive heart and chronic kidney disease, benign, with heart failure and with chronic kidney disease stage I through stage IV, or unspecified         | N18.2 Chronic kidney disease, Stage 2 (mild)                                                                                                                     |
|       | 404.90 Hypertensive heart and chronic kidney disease, unspecified, without heart failure and with chronic kidney disease stage I through stage IV, or unspecified | N18.3 Chronic kidney disease, Stage 3 (moderate)                                                                                                                 |
|       | 404.91 Hypertensive heart and chronic kidney disease, unspecified, with heart failure and with chronic kidney disease stage I through stage IV, or unspecified    | N18.4 Chronic kidney disease, Stage 4 (severe)                                                                                                                   |
|       | 582.x Chronic glomerulonephritis                                                                                                                                  | N18.9 Chronic kidney disease, unspecified                                                                                                                        |
|       | 583.x Nephritis/nephropathy                                                                                                                                       | Z94.0 Kidney transplant status                                                                                                                                   |
|       | 585.1 Chronic kidney disease, Stage I                                                                                                                             |                                                                                                                                                                  |
|       | 585.2 Chronic kidney disease, Stage II (mild)                                                                                                                     |                                                                                                                                                                  |
|       | 585.3 Chronic kidney disease, Stage III (moderate)                                                                                                                |                                                                                                                                                                  |
|       | 585.4 Chronic kidney disease, Stage IV (severe)                                                                                                                   |                                                                                                                                                                  |
|       | 585.9 Chronic kidney disease, unspecified                                                                                                                         |                                                                                                                                                                  |
|       | V42.0 Kidney replaced by transplant                                                                                                                               |                                                                                                                                                                  |

NOTE: Deyo et al. (1992) used one set of codes without differentiation by severity: 582.x, 583.0, 583.1, 583.2, 583.3, 583.4, 583.5, 583.6, 583.7, 585.x, 586.x, and 588.x.

Table SI-3I. Deyo and CDMF CCI Coding Schemes: Diabetes with Chronic Complications

| Score | ICD-9 Diagnosis Code<br>(Deyo et al., 1992)     | ICD-9 Diagnosis Code<br>(CDMF CCI)                                                                          | ICD-10 Diagnosis Code<br>(CDMF CCI)                                                                                                                                                                                                                                                                                                                                                                                                                                                                                                                                                                                  |
|-------|-------------------------------------------------|-------------------------------------------------------------------------------------------------------------|----------------------------------------------------------------------------------------------------------------------------------------------------------------------------------------------------------------------------------------------------------------------------------------------------------------------------------------------------------------------------------------------------------------------------------------------------------------------------------------------------------------------------------------------------------------------------------------------------------------------|
| 2     | 250.4 Diabetes with renal manifestations        | 250.4 Diabetes with renal manifestations                                                                    | <u>Main Codes</u><br>E08 Diabetes mellitus due to underlying condition<br>E09 Drug or chemical induced diabetes mellitus<br>E10 Type 1 diabetes mellitus<br>E11 Type 2 diabetes mellitus<br>E13 Other specified diabetes mellitus<br><br><u>Relevant Subcodes</u><br>E**.2 Diabetes mellitus due to underlying condition with kidney complications<br>E**.3 Diabetes mellitus due to underlying condition with ophthalmic complications<br>E**.4 Diabetes mellitus due to underlying condition with neurological complications<br>E**.5 Diabetes mellitus due to underlying condition with circulatory complications |
|       | 250.4 Diabetes with ophthalmic manifestations   | 250.5 Diabetes with ophthalmic complications                                                                |                                                                                                                                                                                                                                                                                                                                                                                                                                                                                                                                                                                                                      |
|       | 250.6 Diabetes with neurological manifestations | 250.6 Diabetes with neurological manifestations<br><br>250.7 Diabetes with peripheral circulatory disorders |                                                                                                                                                                                                                                                                                                                                                                                                                                                                                                                                                                                                                      |

Table SI-3m. Deyo and CDMF CCI Coding Schemes: Hemiplegia or Paraplegia

| Score | ICD-9 Diagnosis Code<br>(Deyo et al., 1992) | ICD-9 Diagnosis Code<br>(CDMF CCI)                                                                    | ICD-10 Diagnosis Code<br>(CDMF CCI)                                                                                                                                                                                                                                                                            |
|-------|---------------------------------------------|-------------------------------------------------------------------------------------------------------|----------------------------------------------------------------------------------------------------------------------------------------------------------------------------------------------------------------------------------------------------------------------------------------------------------------|
| 2     | 334.1 Hereditary spastic paraplegia         | 334.1 Hereditary spastic paraplegia                                                                   | G04.1 Tropical spastic paraplegia                                                                                                                                                                                                                                                                              |
|       | 342.x Hemiplegia and hemiparesis            | 342.x Hemiplegia and hemiparesis<br>343.x Infantile cerebral palsy<br>344.x Other paralytic syndromes | G11.4 Hereditary spastic paraplegia<br>G80.0 Spastic quadriplegic cerebral palsy<br>G80.1 Spastic diplegic cerebral palsy<br>G80.2 Spastic hemiplegic cerebral palsy<br>G81.x Hemiplegia and hemiparesis<br>G82.x Paraplegia (paraparesis) and quadriplegia (quadriparesis)<br>G83.x Other paralytic syndromes |

Table SI-3n. Deyo and CDMF CCI Coding Schemes: Any malignancy, including lymphoma and leukemia, except malignant nonmelanoma neoplasm of skin

| Score | ICD-9 Diagnosis Code<br>(Deyo et al., 1992)                      | ICD-9 Diagnosis Code<br>(CDMF CCI)                               | ICD-10 Diagnosis Code<br>(CDMF CCI)                                                                                                                                                                  |
|-------|------------------------------------------------------------------|------------------------------------------------------------------|------------------------------------------------------------------------------------------------------------------------------------------------------------------------------------------------------|
| 2     | 14x.x Malignant neoplasm of lip, oral cavity, and pharynx        | 14x.x Malignant neoplasm of lip, oral cavity, and pharynx        | C0x.x Malignant neoplasms of lip, oral cavity and pharynx                                                                                                                                            |
|       | 15x.x Malignant neoplasm of digestive organs and peritoneum      | 15x.x Malignant neoplasm of digestive organs and peritoneum      | C1x.x Malignant neoplasms of lip, oral cavity and pharynx, esophagus, stomach, small intestine, colon                                                                                                |
|       | 16x.x Malignant neoplasm of respiratory and intrathoracic organs | 16x.x Malignant neoplasm of respiratory and intrathoracic organs | C2x.x Malignant neoplasms of rectum, anus, anal canal, liver and intrahepatic bile ducts, gallbladder, other and unspecified part of biliary tract, pancreas, other and ill-defined digestive organs |
|       | 170.x Malignant neoplasm of bone and articular cartilage         | 170.x Malignant neoplasm of bone and articular cartilage         | C30.x Malignant neoplasm of nasal cavity and middle ear                                                                                                                                              |
|       | 171.x Malignant neoplasm of connective and other soft tissue     | 171.x Malignant neoplasm of connective and other soft tissue     | C31.x Malignant neoplasm of accessory sinuses                                                                                                                                                        |
|       | 172.x Malignant melanoma of skin                                 | 172.x Malignant melanoma of skin                                 | C32.x Malignant neoplasm of larynx                                                                                                                                                                   |
|       | 174.x Malignant neoplasm of female breast                        | 174.x Malignant neoplasm of female breast                        |                                                                                                                                                                                                      |
|       | 175.x Malignant neoplasm of male breast                          | 175.x Malignant neoplasm of male breast                          |                                                                                                                                                                                                      |
|       | 176.x Kaposi's sarcoma                                           | 176.x Kaposi's sarcoma                                           |                                                                                                                                                                                                      |
|       | 179.x Malignant neoplasm of                                      | 179.x Malignant neoplasm of                                      |                                                                                                                                                                                                      |

| Score | ICD-9 Diagnosis Code<br>(Deyo et al., 1992)                                                      | ICD-9 Diagnosis Code<br>(CDMF CCI)                                                               | ICD-10 Diagnosis Code<br>(CDMF CCI)                                                                        |
|-------|--------------------------------------------------------------------------------------------------|--------------------------------------------------------------------------------------------------|------------------------------------------------------------------------------------------------------------|
|       | uterus, part unspecified                                                                         | uterus, part unspecified                                                                         | C33.x Malignant neoplasm of trachea                                                                        |
|       | 18x.x Malignant neoplasm of genitourinary organs                                                 | 18x.x Malignant neoplasm of genitourinary organs                                                 | C34.x Malignant neoplasm of bronchus and lung                                                              |
|       | 190.x Malignant neoplasm of eye                                                                  | 190.x Malignant neoplasm of eye                                                                  | C37.x Malignant neoplasm of thymus                                                                         |
|       | 191.x Malignant neoplasm of brain                                                                | 191.x Malignant neoplasm of brain                                                                | C38.x Malignant neoplasm of heart, mediastinum and pleura                                                  |
|       | 192.x Malignant neoplasm of other and unspecified parts of nervous system                        | 192.x Malignant neoplasm of other and unspecified parts of nervous system                        | C39.x Malignant neoplasm of other and ill-defined sites in the respiratory system and intrathoracic organs |
|       | 193.x Malignant neoplasm of thyroid gland                                                        | 193.x Malignant neoplasm of thyroid gland                                                        | C40.x Malignant neoplasm of bone and articular cartilage of limbs                                          |
|       | 194.x Malignant neoplasm of other endocrine glands and related structures                        | 194.x Malignant neoplasm of other endocrine glands and related structures                        | C41.x Malignant neoplasm of bone and articular cartilage of other and unspecified sites                    |
|       | 195.x Malignant neoplasm of other and ill-defined sites                                          | 195.x Malignant neoplasm of other and ill-defined sites                                          | C43.x Malignant melanoma of skin                                                                           |
|       | 200.x Lymphosarcoma and reticulosarcoma and other specified malignant tumors of lymphatic tissue | 199.1 Other malignant neoplasm without specification of site                                     | C45.x Mesothelioma                                                                                         |
|       | 201.x Hodgkin's disease                                                                          | 200.x Lymphosarcoma and reticulosarcoma and other specified malignant tumors of lymphatic tissue | C46.x Kaposi's sarcoma                                                                                     |
|       | 202.x Other malignant neoplasms of lymphoid and histiocytic tissue                               | 201.x Hodgkin's disease                                                                          | C47.x Malignant neoplasm of peripheral nerves and autonomic nervous system                                 |
|       | 203.x Multiple myeloma and immunoproliferative neoplasms                                         | 202.x Other malignant neoplasms of lymphoid and histiocytic tissue                               | C48.x Malignant neoplasm of retroperitoneum and peritoneum                                                 |
|       | 204.x Lymphoid leukemia                                                                          | 203.x Multiple myeloma and immunoproliferative neoplasms                                         | C49.x Malignant neoplasm of other connective and soft tissue                                               |
|       | 205.x Myeloid leukemia                                                                           | 204.x Lymphoid leukemia                                                                          | C50 Malignant neoplasm of breast                                                                           |
|       | 206.x Monocytic leukemia                                                                         | 205.x Myeloid leukemia                                                                           | C51- Malignant neoplasms of female genital organs                                                          |
|       | 207.x Other specified leukemia                                                                   | 206.x Monocytic leukemia                                                                         | C58.x Malignant neoplasm of male genital organs                                                            |
|       | 208.x Leukemia of unspecified cell type                                                          | 207.x Other specified leukemia                                                                   | C60- Malignant neoplasm of other and ill-defined sites                                                     |
|       |                                                                                                  | 208.x Leukemia of unspecified cell type                                                          | C76.x Malignant neoplasm of other and ill-defined sites                                                    |
|       |                                                                                                  | 238.6 Neoplasm of uncertain behavior of plasma cells                                             | C80.1 Malignant (primary) neoplasm, unspecified                                                            |
|       |                                                                                                  |                                                                                                  | C81.x Hodgkin lymphoma                                                                                     |
|       |                                                                                                  |                                                                                                  | C82.x Follicular lymphoma                                                                                  |
|       |                                                                                                  |                                                                                                  | C83.x Non-follicular lymphoma                                                                              |
|       |                                                                                                  |                                                                                                  | C84.x Mature T/NK-cell                                                                                     |

| Score | ICD-9 Diagnosis Code<br>(Deyo et al., 1992) | ICD-9 Diagnosis Code<br>(CDMF CCI) | ICD-10 Diagnosis Code<br>(CDMF CCI)                                                                                                                                                                                                                                                                                                                                                                                                          |
|-------|---------------------------------------------|------------------------------------|----------------------------------------------------------------------------------------------------------------------------------------------------------------------------------------------------------------------------------------------------------------------------------------------------------------------------------------------------------------------------------------------------------------------------------------------|
|       |                                             |                                    | lymphomas<br>C85.x Other specified and unspecified types of non-Hodgkin lymphoma<br>C88.x Malignant immunoproliferative diseases and certain other B-cell lymphomas<br>C9x.x Multiple myeloma and malignant plasma cell neoplasms, lymphoid leukemia, monocytic leukemia, other leukemias of specified cell type, leukemia of unspecified cell type, other and unspecified malignant neoplasms of lymphoid, hematopoietic and related tissue |

Table SI-30. CCI Coding Scheme: Moderate or Severe Liver Disease

| Score | ICD-9 Diagnosis Code<br>(Deyo et al., 1992)                                                                                                                                                                                                                                                              | ICD-9 Diagnosis Code<br>(CDMF CCI)                                                                                                                                                                                                                                                                       | ICD-10 Diagnosis Code<br>(CDMF CCI)                                                                                                                                                                                                                                                                                    |
|-------|----------------------------------------------------------------------------------------------------------------------------------------------------------------------------------------------------------------------------------------------------------------------------------------------------------|----------------------------------------------------------------------------------------------------------------------------------------------------------------------------------------------------------------------------------------------------------------------------------------------------------|------------------------------------------------------------------------------------------------------------------------------------------------------------------------------------------------------------------------------------------------------------------------------------------------------------------------|
| 3     | 456.0 Esophageal varices with bleeding<br>456.1 Esophageal varices without mention of bleeding<br>456.2x Esophageal varices in diseases classified elsewhere<br>572.2 Hepatic encephalopathy<br>572.3 Portal hypertension<br>572.4 Hepatorenal syndrome<br>572.8 Other sequelae of chronic liver disease | 456.0 Esophageal varices with bleeding<br>456.1 Esophageal varices without mention of bleeding<br>456.2x Esophageal varices in diseases classified elsewhere<br>572.2 Hepatic encephalopathy<br>572.3 Portal hypertension<br>572.4 Hepatorenal syndrome<br>572.8 Other sequelae of chronic liver disease | I85.0x Esophageal varices<br>I86.4 Gastric varices<br>K70.4x Alcoholic hepatic failure<br>K71.1x Toxic liver disease with hepatic necrosis<br>K72.1x Chronic hepatic failure<br>K72.9x Hepatic failure, unspecified<br>K76.5 Hepatic veno-occlusive disease<br>K76.6 Portal hypertension<br>K76.7 Hepatorenal syndrome |

Table SI-3p. Deyo and CDMF CCI Coding Schemes: Renal (Severe)

| Score | ICD-9 Diagnosis Code<br>(CDMF CCI)                                                                                                                          | ICD-10 Diagnosis Code<br>(CDMF CCI)                                                                                                        |
|-------|-------------------------------------------------------------------------------------------------------------------------------------------------------------|--------------------------------------------------------------------------------------------------------------------------------------------|
| 3     | 403.01 Hypertensive chronic kidney disease, malignant, with chronic kidney disease stage V or end stage renal disease                                       | I12.0 Hypertensive chronic kidney disease with stage 5 chronic kidney disease or end stage renal disease                                   |
|       | 403.11 Hypertensive chronic kidney disease, benign, with chronic kidney disease stage V or end stage renal disease                                          | I13.11 Hypertensive heart and CKD without heart failure with stage 5 chronic kidney disease, or end stage renal disease                    |
|       | 403.91 Hypertensive chronic kidney disease, unspecified, with chronic kidney disease stage V or end stage renal disease                                     | I13.2 Hypertensive heart and chronic kidney disease with heart failure and with stage 5 chronic kidney disease, or end stage renal disease |
|       | 404.02 Hypertensive heart and chronic kidney disease, malignant, without heart failure and with chronic kidney disease stage V or end stage renal disease   | N18.5 Chronic kidney disease, Stage 5                                                                                                      |
|       | 404.03 Hypertensive heart and chronic kidney disease, malignant, with heart failure and with chronic kidney disease stage V or end stage renal disease      | N18.6 End stage renal disease                                                                                                              |
|       | 404.12 Hypertensive heart and chronic kidney disease, benign, without heart failure and with chronic kidney disease stage V or end stage renal disease      | N19.x Unspecified kidney failure                                                                                                           |
|       | 404.13 Hypertensive heart and chronic kidney disease, benign, with heart failure and chronic kidney disease stage V or end stage renal disease              | N25.0 Renal osteodystrophy                                                                                                                 |
|       | 404.92 Hypertensive heart and chronic kidney disease, unspecified, without heart failure and with chronic kidney disease stage V or end stage renal disease | Z49.x Encounter for care involving renal dialysis                                                                                          |
|       | 404.93 Hypertensive heart and chronic kidney disease, unspecified, with heart failure and chronic kidney disease stage V or end stage renal disease         | Z99.2 Dependence on renal dialysis                                                                                                         |
|       | 585.5 Chronic kidney disease, Stage V                                                                                                                       |                                                                                                                                            |
|       | 585.6 End stage renal disease                                                                                                                               |                                                                                                                                            |
|       | 586.x Renal failure NOS                                                                                                                                     |                                                                                                                                            |
|       | 588.0 Renal osteodystrophy                                                                                                                                  |                                                                                                                                            |
|       | V45.11 Renal dialysis status                                                                                                                                |                                                                                                                                            |
|       | V45.12 Noncompliance with renal dialysis                                                                                                                    |                                                                                                                                            |
|       | V56.0 Encounter for extracorporeal dialysis                                                                                                                 |                                                                                                                                            |
|       | V56.1 Fitting and adjustment of extracorporeal dialysis catheter                                                                                            |                                                                                                                                            |
|       | V56.2 Fitting and adjustment of peritoneal dialysis catheter                                                                                                |                                                                                                                                            |
|       | V56.31 Encounter for adequacy testing for hemodialysis                                                                                                      |                                                                                                                                            |
|       | V56.32 Encounter for adequacy testing for peritoneal dialysis                                                                                               |                                                                                                                                            |
|       | V56.8 Encounter for other dialysis                                                                                                                          |                                                                                                                                            |

NOTE: Deyo et al. (1992) used one set of codes without differentiation by severity: 582.x, 583.0, 583.1, 583.2, 583.3, 583.4, 583.5, 583.6, 583.7, 585.x, 586.x, and 588.x.

Table SI-3q. Deyo and CDMF CCI Coding Schemes: HIV Infection

| Score | ICD-9 Diagnosis Code<br>(Deyo et al., 1992)      | ICD-9 Diagnosis Code<br>( CDMF CCI)              | ICD-10 Diagnosis Code<br>(CDMF CCI)              |
|-------|--------------------------------------------------|--------------------------------------------------|--------------------------------------------------|
| 3     | 042.x Human immunodeficiency virus [HIV] disease | 042.x Human immunodeficiency virus [HIV] disease | B20.x Human immunodeficiency virus [HIV] disease |

NOTE: The Deyo version of the ICD-9 coding system includes codes 043.x and 044.x, which are no longer in use. Corresponding ICD-10 codes B21.x, B22.x, and B24.x also no longer exist.

Table SI-3r. Deyo and CDMF CCI Coding Schemes: Metastatic Solid Tumor

| Score | ICD-9 Diagnosis Code<br>(Deyo et al., 1992)                             | ICD-9 Diagnosis Code<br>( CDMF CCI)                                     | ICD-10 Diagnosis Code<br>(CDMF CCI)                                                                               |
|-------|-------------------------------------------------------------------------|-------------------------------------------------------------------------|-------------------------------------------------------------------------------------------------------------------|
| 6     | 196.x Secondary and unspecified malignant neoplasm of lymph nodes       | 196.x Secondary and unspecified malignant neoplasm of lymph nodes       | C77.x Secondary and unspecified malignant neoplasm of lymph nodes                                                 |
|       | 197.x Secondary malignant neoplasm of respiratory and digestive systems | 197.x Secondary malignant neoplasm of respiratory and digestive systems | C78.x Secondary malignant neoplasm of respiratory and digestive organs                                            |
|       | 198.x Secondary malignant neoplasm of other specified sites             | 198.x Secondary malignant neoplasm of other specified sites             | C79.x Secondary malignant neoplasm of other and unspecified sites                                                 |
|       | 199.0 Disseminated malignant neoplasm without specification of site     | 199.0 Disseminated malignant neoplasm without specification of site     | C80.0 Disseminated malignant neoplasm, unspecified<br>C80.2 Malignant neoplasm associated with transplanted organ |

Table SI-3s. Deyo and CDMF CCI Coding Schemes: AIDS (HIV Infection + opportunistic infection)

| Score | ICD-9 Diagnosis Code<br>(Deyo et al., 1992) | ICD-9 Diagnosis Code<br>( CDMF CCI)                                                                                                                                                                                                                                                                                                                                                                                                                                                                                                                                                                                                                                                                                                                                                                                                                                                                                                         | ICD-10 Diagnosis Code<br>(CDMF CCI)                                                                                                                                                                                                                                                                                                                                                                                                                                                                                                                                                                                                                                                                                                                                                                                                                                                                                           |
|-------|---------------------------------------------|---------------------------------------------------------------------------------------------------------------------------------------------------------------------------------------------------------------------------------------------------------------------------------------------------------------------------------------------------------------------------------------------------------------------------------------------------------------------------------------------------------------------------------------------------------------------------------------------------------------------------------------------------------------------------------------------------------------------------------------------------------------------------------------------------------------------------------------------------------------------------------------------------------------------------------------------|-------------------------------------------------------------------------------------------------------------------------------------------------------------------------------------------------------------------------------------------------------------------------------------------------------------------------------------------------------------------------------------------------------------------------------------------------------------------------------------------------------------------------------------------------------------------------------------------------------------------------------------------------------------------------------------------------------------------------------------------------------------------------------------------------------------------------------------------------------------------------------------------------------------------------------|
| 6     | -- --                                       | 112.x Candidiasis of bronchi, trachea, esophagus, or lungs<br>180.x Invasive cervical cancer<br>114.x Coccidioidomycosis<br>117.5 Cryptococcosis<br>007.4 Cryptosporidiosis, chronic intestinal (greater than 1 month's duration)<br>078.5 Cytomegalovirus disease (particularly CMV retinitis)<br>348.3x Encephalopathy, HIV-related<br>054.x Herpes simplex: chronic ulcer(s) (greater than 1 month's duration); or bronchitis, pneumonitis, or esophagitis<br>115.x Histoplasmosis<br>007.2 Isosporiasis, chronic intestinal (greater than 1 month's duration)<br>176.x Kaposi's sarcoma<br>200-209 Lymphoma, multiple forms<br>031.x Mycobacterium avium comp<br>010-018 Tuberculosis<br>136.3 Pneumocystis carinii pneumonia<br>V12.61 Pneumonia, recurrent (exact)<br>046.3 Progressive multifocal leukoencephalopathy<br>003.1 Salmonella septicemia, recurrent<br>130.x Toxoplasmosis of brain<br>799.4 Wasting syndrome due to HIV | B37.x Candidiasis of bronchi, trachea, esophagus, or lungs<br>C53.x Invasive cervical cancer<br>B38.x Coccidioidomycosis<br>B45.x Cryptococcosis<br>A07.2 Cryptosporidiosis, chronic intestinal (greater than 1 month's duration)<br>B25.x Cytomegalovirus disease (particularly CMV retinitis)<br>G93.4x Encephalopathy, HIV-related<br>B00 Herpes simplex: chronic ulcer(s) (greater than 1 month's duration); or bronchitis, pneumonitis, or esophagitis<br>B39.x Histoplasmosis<br>A07.3 Isosporiasis, chronic intestinal (greater than 1 month's duration)<br>C46.x Kaposi's sarcoma<br>C81-C96 Lymphoma, multiple forms<br>A31.x Mycobacterium avium comp<br>A15-A19 Tuberculosis<br>B59 Pneumocystis carinii pneumonia<br>Z87.01 Pneumonia, recurrent<br>A81.2 Progressive multifocal leukoencephalopathy<br>A02.1 Salmonella septicemia, recurrent<br>B58.x Toxoplasmosis of brain<br>R64 Wasting syndrome due to HIV |

See Bibliography, next page

## **Bibliography, Supplemental Appendix I**

Deyo RA, Cherkin DC, Ciol MA. Adapting a clinical comorbidity index for use with ICD-9-CM administrative databases. *J. Clin. Epidemiol.* 1992;45(6):613-619.

Quan H, Sundararajan V, Halfon P, et al. Coding algorithms for defining comorbidities in ICD-9-CM and ICD-10 administrative data. *Med. Care.* 2005;43(11):1130-1139.

Supplemental Appendix II

Table SII-1. Population Characteristics by Time Window

| Characteristic                      | Oct. 2013 to Sept. 2014<br>(ICD-9) | Oct. 2014 to Sept. 2015<br>(ICD-9) | Oct. 2015 to Sept. 2016<br>(ICD-10) |
|-------------------------------------|------------------------------------|------------------------------------|-------------------------------------|
| <b>TOTAL, n</b>                     | 1,791,171                          | 2,052,698                          | 2,163,082                           |
| <b>Male Sex, n</b>                  | 786,287                            | 905,430                            | 964,422                             |
| <b>Age (years), mean</b>            | 75.0                               | 74.9                               | 74.8                                |
| <b>Male: Age Subgroups, n (%)</b>   |                                    |                                    |                                     |
| 65-69                               | 200,394 (11.2%)                    | 241,910 (11.8%)                    | 261,998 (12.1%)                     |
| 70-74                               | 242,347 (13.5%)                    | 271,684 (13.2%)                    | 284,286 (13.1%)                     |
| 75-79                               | 165,584 (9.2%)                     | 190,637 (9.3%)                     | 207,055 (9.6%)                      |
| 80-84                               | 102,238 (5.7%)                     | 116,019 (5.7%)                     | 122,346 (5.7%)                      |
| 85-90                               | 54,029 (3.0%)                      | 60,774 (3.0%)                      | 62,908 (2.9%)                       |
| 90-94                               | 18,354 (1.0%)                      | 20,522 (1.0%)                      | 21,640 (1.0%)                       |
| 95++                                | 3,341 (0.19%)                      | 3,854 (0.19%)                      | 4,189 (0.19%)                       |
| <b>Female: Age Subgroups, n (%)</b> |                                    |                                    |                                     |
| 65-69                               | 253,195 (14.1%)                    | 302,972 (14.8%)                    | 322,144 (14.9%)                     |
| 70-74                               | 289,653 (16.1%)                    | 325,125 (15.8%)                    | 336,264 (15.6%)                     |
| 75-79                               | 196,344 (11.0%)                    | 225,396 (11.0%)                    | 241,100 (11.1%)                     |
| 80-84                               | 135,311 (7.6%)                     | 149,839 (7.3%)                     | 154,261 (7.1%)                      |
| 85-90                               | 84,081 (5.0%)                      | 92,712 (4.5%)                      | 93,178 (4.3%)                       |
| 90-94                               | 36,616 (2.0%)                      | 40,133 (2.0%)                      | 40,286 (1.9%)                       |
| 95++                                | 9,684 (0.54%)                      | 11,091 (0.54%)                     | 11,427 (0.53%)                      |
| <b>Race, n (%)</b>                  |                                    |                                    |                                     |
| White                               | 1,523,493 (85.2%)                  | 1,722,262 (83.9%)                  | 1,783,800 (82.5%)                   |
| Black                               | 194,398 (10.9%)                    | 239,925 (11.7%)                    | 270,619 (12.5%)                     |
| Hispanic                            | 23,939 (1.3%)                      | 27,093 (1.3%)                      | 30,318 (1.4%)                       |
| Asian                               | 15,010 (0.84%)                     | 18,800 (0.92%)                     | 24,783 (1.1%)                       |
| Native American                     | 3,163 (0.18%)                      | 3,779 (0.18%)                      | 4,134 (0.19%)                       |
| Other                               | 22,305 (1.2%)                      | 26,766 (1.3%)                      | 32,003 (1.5%)                       |
| Unknown                             | 8,863 (0.50%)                      | 14,073 (0.69%)                     | 17,425 (0.81%)                      |
| <b>CCI Score, mean</b>              | 4.910                              | 4.915                              | 4.883                               |
| <b>(95% CI)</b>                     | (4.906-4.913)                      | (4.912-4.918)                      | (4.880-4.886)                       |

CCI, Charlson Comorbidity Index; CI, confidence interval; ICD-9(10), International Classification of Diseases, Ninth(Tenth) Edition

**Table SII-2. Prevalence of Each CCI Condition**

| Characteristic n(%)         | Oct. 2013 to Sept. 2014<br>(ICD-9) | Oct. 2014 to Sept. 2015<br>(ICD-9) | Oct. 2015 to Sept. 2016<br>(ICD-10) |
|-----------------------------|------------------------------------|------------------------------------|-------------------------------------|
| Myocardial Infarction       | 123,181 (6.9%)                     | 139,216 (6.8%)                     | 138,701 (6.4%)                      |
| Congestive heart failure    | 213,967 (11.9%)                    | 251,514 (12.3%)                    | 272,205 (12.6%)                     |
| Peripheral vascular disease | 338,626 (18.9%)                    | 394,851 (19.2%)                    | 428,537 (19.8%)                     |
| Cardiovascular disease      | 230,921 (12.9%)                    | 260,189 (12.7%)                    | 237,026 (11.0%)                     |
| Dementia                    | 108,968 (6.1%)                     | 121,522 (5.9%)                     | 135,514 (6.3%)                      |
| Cephalopelvic disproportion | 395,871 (22.1%)                    | 466,482 (22.7%)                    | 479,359 (22.2%)                     |
| Cumulative trauma disorder  | 65,256 (3.6%)                      | 75,333 (3.7%)                      | 76,132 (3.5%)                       |
| Ulcer (mild)                | 24,542 (1.4%)                      | 27,398 (1.3%)                      | 29,191 (1.4%)                       |
| Liver (mild)                | 65,783 (3.7%)                      | 80,318 (3.9%)                      | 85,234 (3.9%)                       |
| Diabetes (mild)             | 336,160 (18.8%)                    | 377,275 (18.4%)                    | 360,986 (16.7%)                     |
| Renal (mild-moderate)       | 293,582 (16.4%)                    | 356,280 (17.4%)                    | 390,455 (18.1%)                     |
| Diabetes Complications      | 237,194 (13.2%)                    | 288,481 (14.1%)                    | 344,240 (15.9%)                     |
| Hemiplegia or paraplegia    | 17,277 (0.97%)                     | 19,738 (0.96%)                     | 24,438 (1.1%)                       |
| Malignancy                  | 193,351 (10.8%)                    | 218,080 (10.6%)                    | 194,286 (9.0%)                      |
| Liver (moderate-severe)     | 5,357 (0.30%)                      | 6,798 (0.33%)                      | 7,271 (0.34%)                       |
| Renal (severe)              | 42,898 (2.4%)                      | 45,732 (2.2%)                      | 42,239 (2.0%)                       |
| HIV                         | 903 (0.05%)                        | 1,085 (0.05%)                      | 1,338 (0.06%)                       |
| Metastatic                  | 20,053 (1.1%)                      | 22,966 (1.1%)                      | 25,874 (1.2%)                       |
| AIDS                        | 175 (0.10%)                        | 253 (0.01%)                        | 275 (0.01%)                         |
| POPULATION TOTAL            | 1,791,171 (100%)                   | 2,052,698 (100%)                   | 2,163,082 (100%)                    |

AIDS, acquired immune deficiency syndrome; HIV, human immunodeficiency virus; ICD-9(10), International Classification of Disease, Ninth(Tenth) Edition

**Table SII-3a. Prevalence of Each CCI Score Level, Eliminating Age from Scoring**

| CCI Score    | Oct. 2013 to Sept. 2014<br>(ICD-9) | Oct. 2014 to Sept. 2015<br>(ICD-9) | Oct. 2015 to Sept. 2016<br>(ICD-10) |
|--------------|------------------------------------|------------------------------------|-------------------------------------|
| 0            | 564,411 (31.5%)                    | 643,459 (31.3%)                    | 685,899 (31.7%)                     |
| 1            | 399,386 (22.3%)                    | 451,520 (22.0%)                    | 473,404 (21.9%)                     |
| 2            | 296,664 (16.6%)                    | 336,175 (16.4%)                    | 355,615 (16.4%)                     |
| 3            | 205,815 (11.5%)                    | 238,677 (11.6%)                    | 252,300 (11.7%)                     |
| 4            | 129,813 (7.2%)                     | 152,392 (7.4%)                     | 159,930 (7.4%)                      |
| 5            | 79,398 (4.4%)                      | 94,104 (4.6%)                      | 97,511 (4.5%)                       |
| 6            | 49,240 (2.7%)                      | 58,618 (2.9%)                      | 59,736 (2.8%)                       |
| 7            | 30,147 (1.7%)                      | 35,213 (1.7%)                      | 35,261 (1.6%)                       |
| 8            | 16,972 (0.95%)                     | 19,935 (0.97%)                     | 19,958 (0.92%)                      |
| 9            | 9,528 (0.53%)                      | 11,125 (0.54%)                     | 11,313 (0.52%)                      |
| 10           | 4,983 (0.28%)                      | 5,853 (0.29%)                      | 5,925 (0.27%)                       |
| 11           | 2,532 (0.14%)                      | 2,926 (0.14%)                      | 3,273 (0.15%)                       |
| 12           | 1,218 (0.07%)                      | 1,434 (0.07%)                      | 1,587 (0.07%)                       |
| 13           | 574 (0.03%)                        | 705 (0.03%)                        | 760 (0.04%)                         |
| 14           | 287 (0.02%)                        | 308 (0.02%)                        | 339 (0.02%)                         |
| 15           | 121 (0.01%)                        | 166 (0.01%)                        | 155 (0.01%)                         |
| 16           | 55 (0.003%)                        | 59 (0.003%)                        | 71 (0.003%)                         |
| 17           | 20 (0.001%)                        | 16 (0.001%)                        | 29 (0.001%)                         |
| 18           | 3 (0.0002%)                        | 12 (0.001%)                        | 10 (0.001%)                         |
| 19           | 2 (0.0001%)                        | 1 (0.0001%)                        | 4 (0.0002%)                         |
| 20           | 2 (0.0001%)                        | 0                                  | 2 (0.0001%)                         |
| <b>TOTAL</b> | <b>1,791,171 (100%)</b>            | <b>2,052,698 (100%)</b>            | <b>2,163,082 (100%)</b>             |

CCI, Charlson Comorbidity Index; ICD-9(10), International Classification of Disease, Ninth(Tenth) Edition

**Table SII-3b. Prevalence of Each CCI Score Level, Taking Age into Account**

| CCI Score | Oct. 2013 to Sept. 2014 | Oct. 2014 to Sept. 2015 | Oct. 2015 to Sept. 2016 |
|-----------|-------------------------|-------------------------|-------------------------|
|           | (ICD-9)                 | (ICD-9)                 | (ICD-10)                |
| 2         | 182,155 (10.2%)         | 216,931 (10.6%)         | 233,257 (10.8%)         |
| 3         | 391,886 (21.9%)         | 446,029 (21.7%)         | 473,993 (21.9%)         |
| 4         | 355,262 (19.8%)         | 400,801 (19.5%)         | 422,856 (19.6%)         |
| 5         | 279,579 (15.6%)         | 316,130 (15.4%)         | 333,952 (15.4%)         |
| 6         | 204,762 (11.4%)         | 234,164 (11.4%)         | 246,482 (11.4%)         |
| 7         | 140,435 (7.8%)          | 162,471 (7.9%)          | 170,387 (7.9%)          |
| 8         | 92,981 (5.2%)           | 107,559 (5.2%)          | 111,999 (5.2%)          |
| 9         | 59,228 (3.3%)           | 70,022 (3.4%)           | 71,370 (3.3%)           |
| 10        | 37,438 (2.1%)           | 43,476 (2.1%)           | 43,640 (2.0%)           |
| 11        | 22,045 (1.2%)           | 25,672 (1.3%)           | 25,336 (1.2%)           |
| 12        | 12,295 (0.69%)          | 14,226 (0.69%)          | 14,166 (0.66%)          |
| 13        | 6,646 (0.37%)           | 7,691 (0.38%)           | 7,685 (0.36%)           |
| 14        | 3,345 (0.19%)           | 3,937 (0.19%)           | 4,047 (0.19%)           |
| 15        | 1,680 (0.09%)           | 1,905 (0.09%)           | 2,075 (0.10%)           |
| 16        | 767 (0.04%)             | 927 (0.05%)             | 1,029 (0.05%)           |
| 17        | 375 (0.02%)             | 416 (0.02%)             | 456 (0.02%)             |
| 18        | 175 (0.01%)             | 205 (0.01%)             | 207 (0.01%)             |
| 19        | 79 (0.004%)             | 96 (0.005%)             | 88 (0.004%)             |
| 20        | 25 (0.001%)             | 24 (0.001%)             | 36 (0.002%)             |
| 21        | 9 (0.001%)              | 11 (0.001%)             | 14 (0.001%)             |
| 22        | 2 (0.0001%)             | 5 (0.0002%)             | 5 (0.0002%)             |
| 23        | 2 (0.0001%)             | 0                       | 2 (0.0001%)             |
| TOTAL     | 1,791,171 (100.00%)     | 2,052,698 (100.00%)     | 2,163,082 (100.00%)     |

CCI, Charlson Comorbidity Index; ICD-9(10), International Classification of Disease, Ninth(Tenth) Edition

**Table SII-4. Mean Inpatient Admissions Per Thousand Per Year by CCI Score Level**

| CCI Score | Oct. 2013 to Sept. 2014<br>(ICD-9) |                               | Oct. 2014 to Sept. 2015<br>(ICD-9) |                               | Oct. 2015 to Sept. 2016<br>(ICD-10) |                               |
|-----------|------------------------------------|-------------------------------|------------------------------------|-------------------------------|-------------------------------------|-------------------------------|
|           | N                                  | Mean Admissions/1000 (95% CI) | N                                  | Mean Admissions/1000 (95% CI) | N                                   | Mean Admissions/1000 (95% CI) |
| 2         | 182,155                            | 29.9<br>(29.1-30.8)           | 216,931                            | 28.9<br>(28.1-29.7)           | 233,257                             | 28.0<br>(27.3-28.8)           |
| 3         | 391,886                            | 46.6<br>(45.8-47.3)           | 446,029                            | 46.4<br>(45.7-47.1)           | 473,993                             | 45.0<br>(44.4-45.7)           |
| 4         | 355,262                            | 84.3<br>(83.2-85.4)           | 400,801                            | 83.9<br>(82.9-85.0)           | 422,856                             | 79.6<br>(78.6-80.6)           |
| 5         | 279,579                            | 142.4<br>(140.8-144.0)        | 316,130                            | 139.8<br>(138.3-141.4)        | 333,952                             | 131.5<br>(130.1-133.0)        |
| 6         | 204,762                            | 222.3<br>(219.8-224.8)        | 234,164                            | 215.7<br>(213.4-217.9)        | 246,482                             | 202.9<br>(200.8-205.0)        |
| 7         | 140,435                            | 324.5<br>(320.8-328.2)        | 162,471                            | 316.5<br>(313.1-319.9)        | 170,387                             | 298.6<br>(295.4-301.7)        |
| 8         | 92,981                             | 451.3<br>(445.8-456.8)        | 107,559                            | 443.4<br>(438.4-448.4)        | 111,999                             | 421.2<br>(416.4-426.0)        |
| 9         | 59,228                             | 618.4<br>(610.2-626.7)        | 70,022                             | 595.3<br>(588.0-602.7)        | 71,370                              | 580.3<br>(573.2-587.4)        |
| 10        | 37,438                             | 811.9<br>(799.7-824.1)        | 43,476                             | 792.6<br>(781.6-803.6)        | 43,640                              | 759.3<br>(748.7-769.9)        |
| 11        | 22,045                             | 1,015.7<br>(997.8-1,033.6)    | 25,672                             | 1,005.6<br>(989.0-1,022.1)    | 25,336                              | 984.8<br>(968.5-1,001.2)      |
| 12        | 12,295                             | 1,252.4<br>(1,225.5-1,279.3)  | 14,226                             | 1,481.2<br>(1,443.5-1,518.9)  | 14,166                              | 1,215.2<br>(1,190.9-1,239.4)  |
| 13        | 6,646                              | 1,533.3<br>(1,492.5-1,574.0)  | 7,691                              | 1,253.1<br>(1,228.2-1,278.0)  | 7,685                               | 1,440.1<br>(1,404.2-1,475.9)  |
| 14        | 3,345                              | 1,762.0<br>(1,698.9-1,825.2)  | 3,937                              | 1,688.9<br>(1,632.1-1,745.6)  | 4,047                               | 1,650.4<br>(1,595.9-1,704.9)  |
| 15+       | 3,114                              | 2,100.8<br>(2,028.1-2,173.6)  | 3,589                              | 2,012.8<br>(1,948.0-2,077.7)  | 3,912                               | 1,967.5<br>(1,907.1-2,028.0)  |

CCI, Charlson Comorbidity Index; CI, confidence interval ICD-9(10), International Classification of Disease, Ninth (Tenth) Edition
